# Supplementary material
Source: Springer Nature journal article supplement (https://www.springermedizin.de/resource/supplementary/12891_2010_892_MOESM7_ESM.pdf/9506646)
Supplement: MOESM7 [file 9506646]

## RUNNING A FIGURE OF EIGHT

**Purpose:** To assess agility, speed and body control during rapid turns.

**Method:** The conscript runs as fast as possible a figure of eight around two traffic cones placed 10 metres apart with the start/finish line next to one of the cones. The stopwatch is started concurrently with the starting signal and stopped when the subject crosses the start/finish line again.

**Outcome:** Time in seconds. Result were categorised in quartiles: 1st quartile ( $<6.03$ ), 2nd quartile ( $6.03 \leq \text{time} < 6.27$ ), 3rd quartile ( $6.27 \leq \text{time} \leq 6.60$ ), 4th quartile ( $> 6.60$ ).

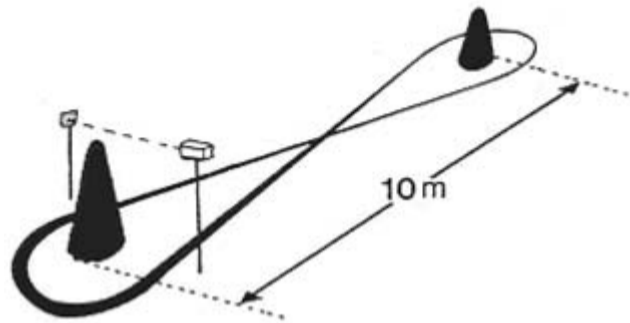

Diagram of the performance of running a figure of eight test.
